# Supplementary material
Source: publisher figshare collection journal article supplement (https://acs.figshare.com/ndownloader/files/4106062)
Supplement: Supplementary file 1 [file 4106062]

Supporting Information for

## Continuous Co-crystallization as a Separation Technology: The Study of 1:2 Co-crystals of Phenazine-Vanillin

Tu Lee,\* Hsin Rong Chen, Hong Yu Lin and Hung Lin Lee

Department of Chemical and Materials Engineering, National Central University,

300 Jhong-Da Road, Jhong-Li City 320, Taiwan R. O. C.

\*To whom correspondence should be addressed, Email: [tulee@cc.ncu.edu.tw](mailto:tulee@cc.ncu.edu.tw)

### **This PDF file includes:**

Figures S1 to S2, Tables S1 to S7, and Mixed Suspension, Mixed Product Removal  
(MSMPR) formalism.

**Fig. S1.** Lee et al.

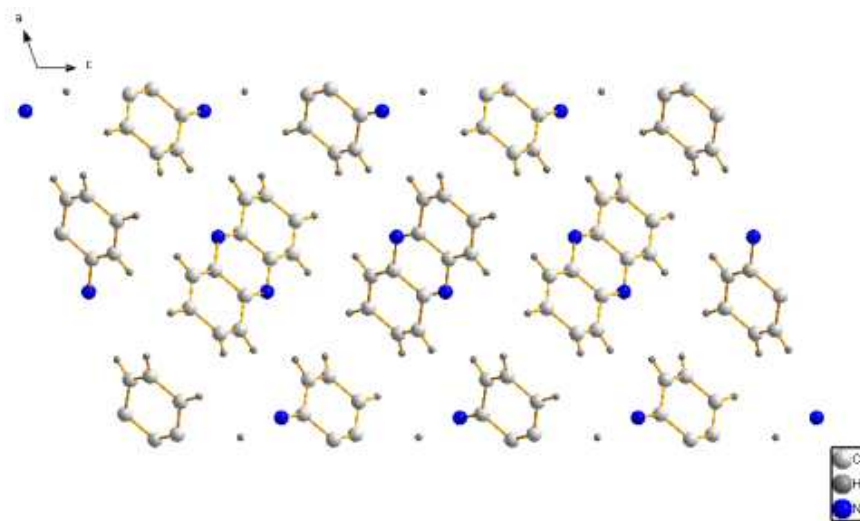

**(a)**

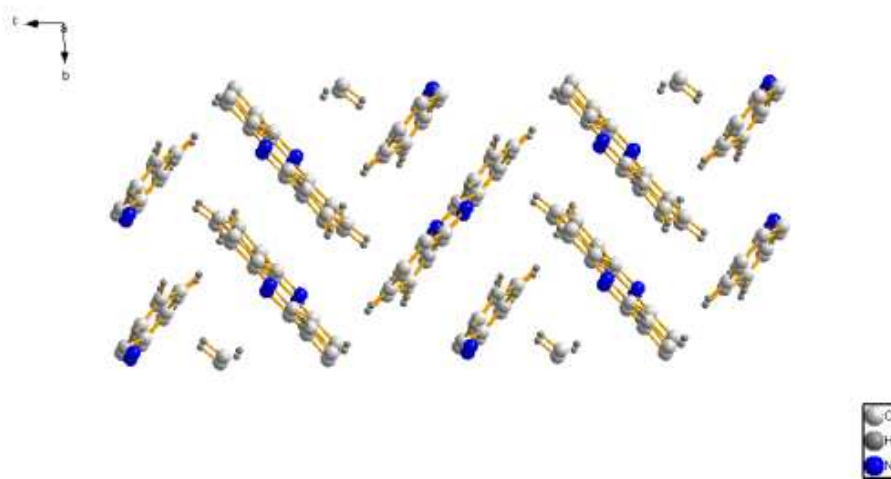

**(b)**

**Figure S1.** View of the crystal structure of phenazine Form  $\alpha$  (a) along the  $b$ -axis, and (b) along the  $a$ -axis.

**Fig. S2.** Lee et al.

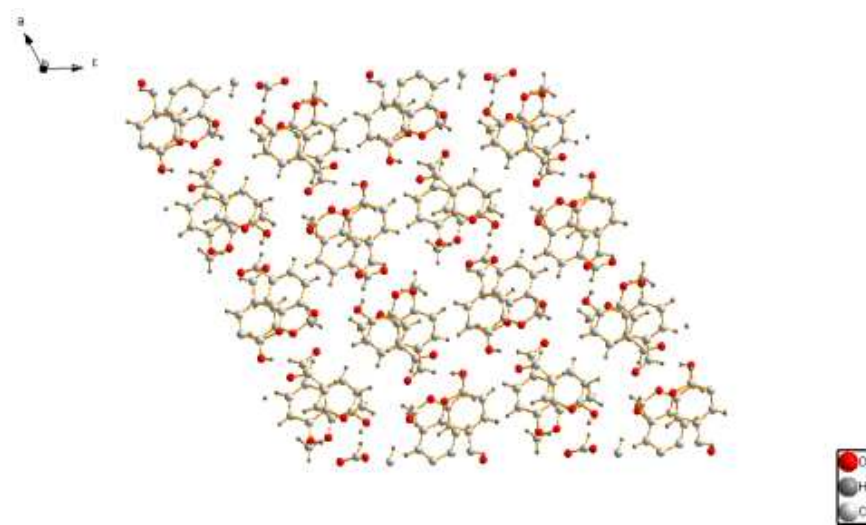

(a)

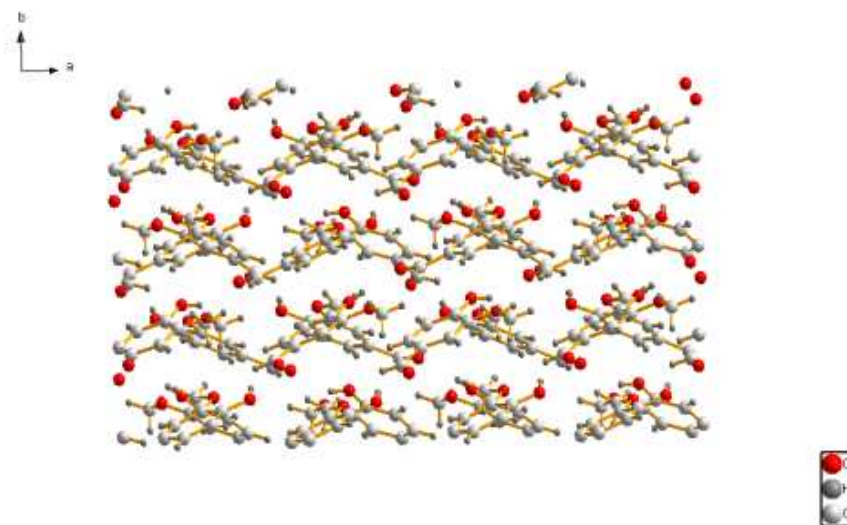

(b)

**Figure S2.** View of the crystal structure of vanillin Form I (a) along the *b*-axis, and (b) along the *c*-axis.

**Table S1. Lee et al.**

**Table S1.** Materials balance for continuous crystallization with a flow rate of 90 mL/min and batch crystallization of 1:2 co-crystals of phenazine-vanillin in toluene.

|                            | Toluene<br>Volume<br>(ml) | Total<br>Weight<br>Of Starting<br>Materials<br>(g) | Residence<br>Time<br>(s) | Co-crystal<br>Weight<br>Retained<br>on<br>Sieves<br>(g) | Yield<br>(wt%) | Mother<br>Liquor<br>Volume<br>(ml) | Mother<br>Liquor<br>Concentration<br>(g/l) | Co-crystal<br>Weight<br>in Mother<br>Liquor<br>(g) | Total<br>Co-crystal<br>Weight (g) |
|----------------------------|---------------------------|----------------------------------------------------|--------------------------|---------------------------------------------------------|----------------|------------------------------------|--------------------------------------------|----------------------------------------------------|-----------------------------------|
| Continuous                 | 150                       | 24.1±0.1                                           | 196                      | 8.5±0.08                                                | 51.2±0.7       | 141.7±0.6                          | 87.8±8.9                                   | 12.4±1.2                                           | 20.9±1.2.                         |
| Batch with<br>no agitation | 150                       | 24.1±0.04                                          | 196                      | 5.8±0.05                                                | 34.9±0.4       | 145.0±0.1                          | 117.2±4.2                                  | 17.0±0.6                                           | 22.8±0.6                          |
| Batch with<br>stirring     | 150                       | 24.0±<br>0.001                                     | 196                      | 9.5±1.3                                                 | 57.7±8.1       | 141.0±6.8                          | 90.0±7.4                                   | 12.6±0.7                                           | 22.2±1.5                          |

1. Yield = Solid weight retained on sieves ÷ (Total weight of starting materials – Toluene volume × 50 mg/mL at 25°C) × 100%
2. Co-crystal weight in mother liquor = Mother liquor volume × Mother liquor concentration
3. Total co-crystal weight = Co-crystal weight retained on sieves + Co-crystal weight in mother liquor

**Table S2.** Lee et al.

**Table S2.** Mass retained in sieve analysis for continuous crystallization with a flow rate of 90 mL/min of 1:2 co-crystals of phenazine-vanillin in toluene.

| <b>Sieve<br/>(Mesh)</b> | <b>Size of Mesh<br/>(mm)</b> | <b>Cumulative<br/>Percent<br/>Retained</b> |
|-------------------------|------------------------------|--------------------------------------------|
| 35                      | 0.5                          |                                            |
| 50                      | 0.3                          | 26±3.6                                     |
| 60                      | 0.25                         | 44.3±5.0                                   |
| 100                     | 0.15                         | 63.7±2.5                                   |
| 120                     | 0.125                        | 82.3±2.5                                   |
| 200                     | 0.075                        | 100±0                                      |

**Table S3.** Lee et al.

**Table S3.** Population density distribution data obtained from sieve analysis for continuous crystallization with a flow rate of 90 mL/min of 1:2 co-crystals of phenazine-vanillin in toluene.

| Sieve<br>(Mesh) | Average Size<br>Retained<br>(mm) | Difference,<br>$\Delta L$ (mm) | In (Population<br>Density) |
|-----------------|----------------------------------|--------------------------------|----------------------------|
| 50              | 0.4                              | 0.2                            | 10.6±0.19                  |
| 60              | 0.275                            | 0.05                           | 13.5±0.13                  |
| 100             | 0.2                              | 0.1                            | 13.8±0.23                  |
| 120             | 0.1375                           | 0.025                          | 16.3±0.15                  |
| 200             | 0.1                              | 0.05                           | 16.5±0.14                  |

**Table S4.** Lee et al.

**Table S4.** Mass retained in sieve analysis for batch crystallization with no agitation of 1:2 co-crystals of phenazine-vanillin in toluene.

| <b>Sieve<br/>(Mesh)</b> | <b>Size of Mesh<br/>(mm)</b> | <b>Cumulative<br/>Percent<br/>Retained</b> |
|-------------------------|------------------------------|--------------------------------------------|
| 35                      | 0.5                          |                                            |
| 50                      | 0.3                          | 65.7±5.5                                   |
| 60                      | 0.25                         | 81.3±5.7                                   |
| 100                     | 0.15                         | 91.3±3.8                                   |
| 120                     | 0.125                        | 95.3±2.1                                   |
| 200                     | 0.075                        | 100±0                                      |

**Table S5.** Lee et al.

**Table S5.** Population density distribution data obtained from sieve analysis for batch crystallization with no agitation of 1:2 co-crystals of phenazine-vanillin in toluene.

| <b>Sieve<br/>(Mesh)</b> | <b>Average Size<br/>Retained<br/>(mm)</b> | <b>Difference,<br/><math>\Delta L</math> (mm)</b> | <b>ln (Population<br/>Density)</b> |
|-------------------------|-------------------------------------------|---------------------------------------------------|------------------------------------|
| 50                      | 0.4                                       | 0.2                                               | 10.6±0.07                          |
| 60                      | 0.275                                     | 0.05                                              | 13.0±0.06                          |
| 100                     | 0.2                                       | 0.1                                               | 12.7±0.2                           |
| 120                     | 0.1375                                    | 0.025                                             | 14.0±0.41                          |
| 200                     | 0.1                                       | 0.05                                              | 14.6±0.43                          |



**Table S6.** Lee et al.

**Table S6.** Mass retained in sieve analysis for batch crystallization with stirring of 1:2 co-crystals of phenazine-vanillin in toluene.

| <b>Sieve<br/>(Mesh)</b> | <b>Size of Mesh<br/>(mm)</b> | <b>Cumulative<br/>Percent<br/>Retained</b> |
|-------------------------|------------------------------|--------------------------------------------|
| 35                      | 0.5                          |                                            |
| 50                      | 0.3                          | 73.35±5.9                                  |
| 60                      | 0.25                         | 82.84±3.1                                  |
| 100                     | 0.15                         | 95.95±1.5                                  |
| 120                     | 0.125                        | 97.61±0.6                                  |
| 200                     | 0.075                        | 100±0                                      |

**Table S7.** Lee et al.

**Table S7.** Population density distribution data obtained from sieve analysis for batch crystallization with stirring of 1:2 co-crystals of phenazine-vanillin in toluene.

| <b>Sieve<br/>(Mesh)</b> | <b>Average Size<br/>Retained<br/>(mm)</b> | <b>Difference,<br/><math>\Delta L</math> (mm)</b> | <b>ln (Population<br/>Density)</b> |
|-------------------------|-------------------------------------------|---------------------------------------------------|------------------------------------|
| 50                      | 0.4                                       | 0.2                                               | 17.5±0.17                          |
| 60                      | 0.275                                     | 0.05                                              | 17.9±0.36                          |
| 100                     | 0.2                                       | 0.1                                               | 18.6±0.10                          |
| 120                     | 0.1375                                    | 0.025                                             | 18.9±0.63                          |
| 200                     | 0.1                                       | 0.05                                              | 19.6±0.19                          |

## The Mixed Suspension, Mixed Product Removal (MSMPR) Formalism for the Population Density

To approximate  $G$  and  $B^0$  based on the sieve analysis developed for an MSMPR crystallizer at steady state:

$$\tau \frac{d(Gn)}{dL} + n = 0 \quad (S1)$$

where  $n$  is population density,  $L$  is characteristic size. If  $G$  is not a function of  $L$ , the result becomes:

$$\frac{dn}{dL} = -\frac{n}{G\tau} \quad (S2)$$

If the boundary condition of  $n^0$  representing zero-sized particles is employed, i.e.,  $n(0) = n^0$ , the final result is:

$$n = n^0 \exp\left(-\frac{L}{G\tau}\right) \quad (S3)$$

Therefore, the growth rate,  $G$ , can be determined from the slope of  $\ln(n)$  vs.  $L$ :

$$\ln n = -\left(\frac{1}{G\tau}\right)L + \ln n^0 \quad (S4)$$

If  $B^0$  is the rate of appearance of near zero-sized particles,

$$B^0 = \left. \frac{dN}{dt} \right|_{L \rightarrow 0} = \left[ \frac{dN}{dL} \cdot \frac{dL}{dt} \right]_{L \rightarrow 0} = n^0 G$$

(S5)

where  $N$  is the number data. The cumulative sieve data are reduced to the population density by:

$$n = \frac{\Delta m}{k_v \rho \bar{L}^3 (\Delta L)} \quad (S6)$$

where  $\Delta m$  is the weight retained on a sieve,  $k_v$  is the volumetric shape factor,  $\rho$  is the crystal mass density,  $\bar{L}$  is the mean size of the sieve on which the particles are retained and the sieve above it in the stack, and  $\Delta L$  is the size difference between the two sieves just mentioned.

For example, the crystals average size retained on the 60 mesh in Table S2 is calculated to be: average size retained,  $\bar{L}_{60} = \frac{0.3 + 0.25}{2} = 0.275$  mm, and the mesh size difference is,  $\Delta L = 0.3 - 0.25 = 0.05$  mm for the 60 mesh sieve in Table S3.

The cumulative sieve data are then reduced to population density by eq S6. The suspension density,  $\rho$ , is calculated from Table S1 as: co-crystal weight retained on sieves  $\div$  toluene volume = 56 g/l for continuous co-crystallization, and 39 g/l for batch co-crystallization. We will assume  $k_v = 10$  for the needle-shaped 1:2 co-crystals of phenazine:vanillin and  $\rho = 1.4$  g/cm<sup>3</sup> from the crystal lattice density of co-crystals as determined by SXD in Table 1. The population density,  $n$ , for the 60 mesh sieve in Table S3 is calculated as:

$$n = \frac{\Delta m}{k_v \rho \bar{L}^3 \Delta L} = \frac{(0.443 - 0.26) \times 56 \frac{g}{l}}{10 \times 1.4 \frac{g}{cm^3} \times \frac{1 cm^3}{1000 mm^3} \times (0.275 \frac{mm}{no. crystals})^3 (0.05 mm)}$$

Thus,  $n = 703951.9$  no. crystals/mm $\cdot$ l and  $\ln(n) = 13.5$ . The remaining values are given in Table S3.
